# Supplementary material
Source: PubMed Central journal article supplement (PMC4607765)

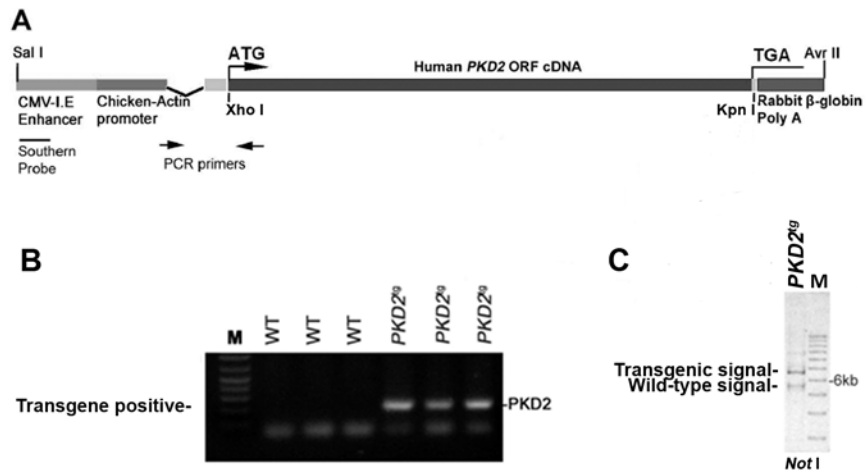

Supplement: mmc1.pdf [file mmc1.pdf]

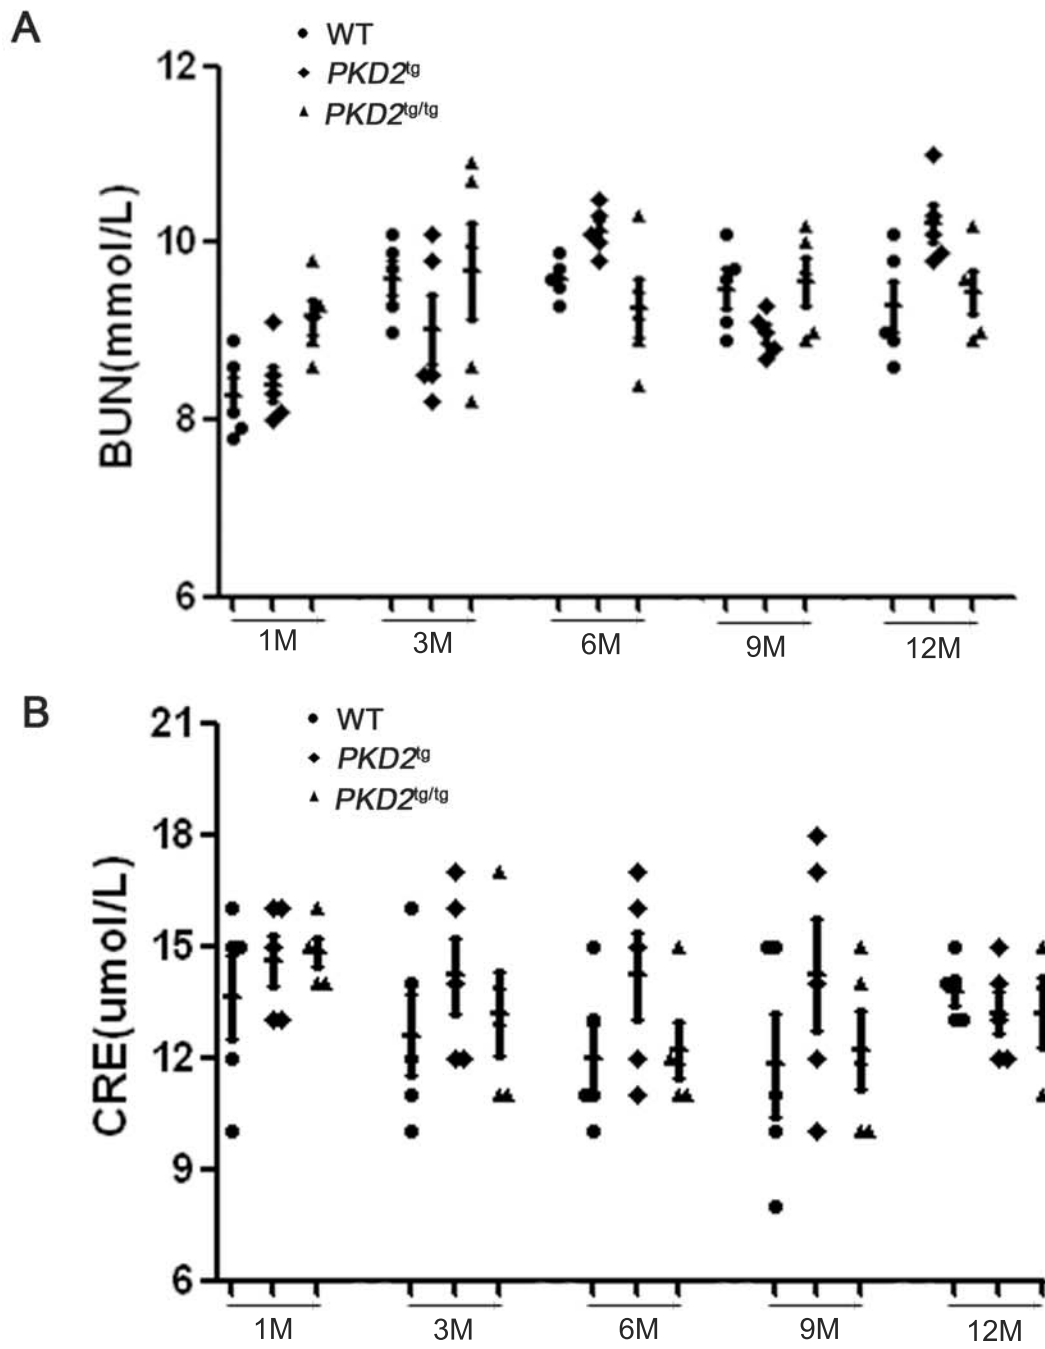

Supplemental Fig. S2

Supplement: mmc2.pdf [file mmc2.pdf]

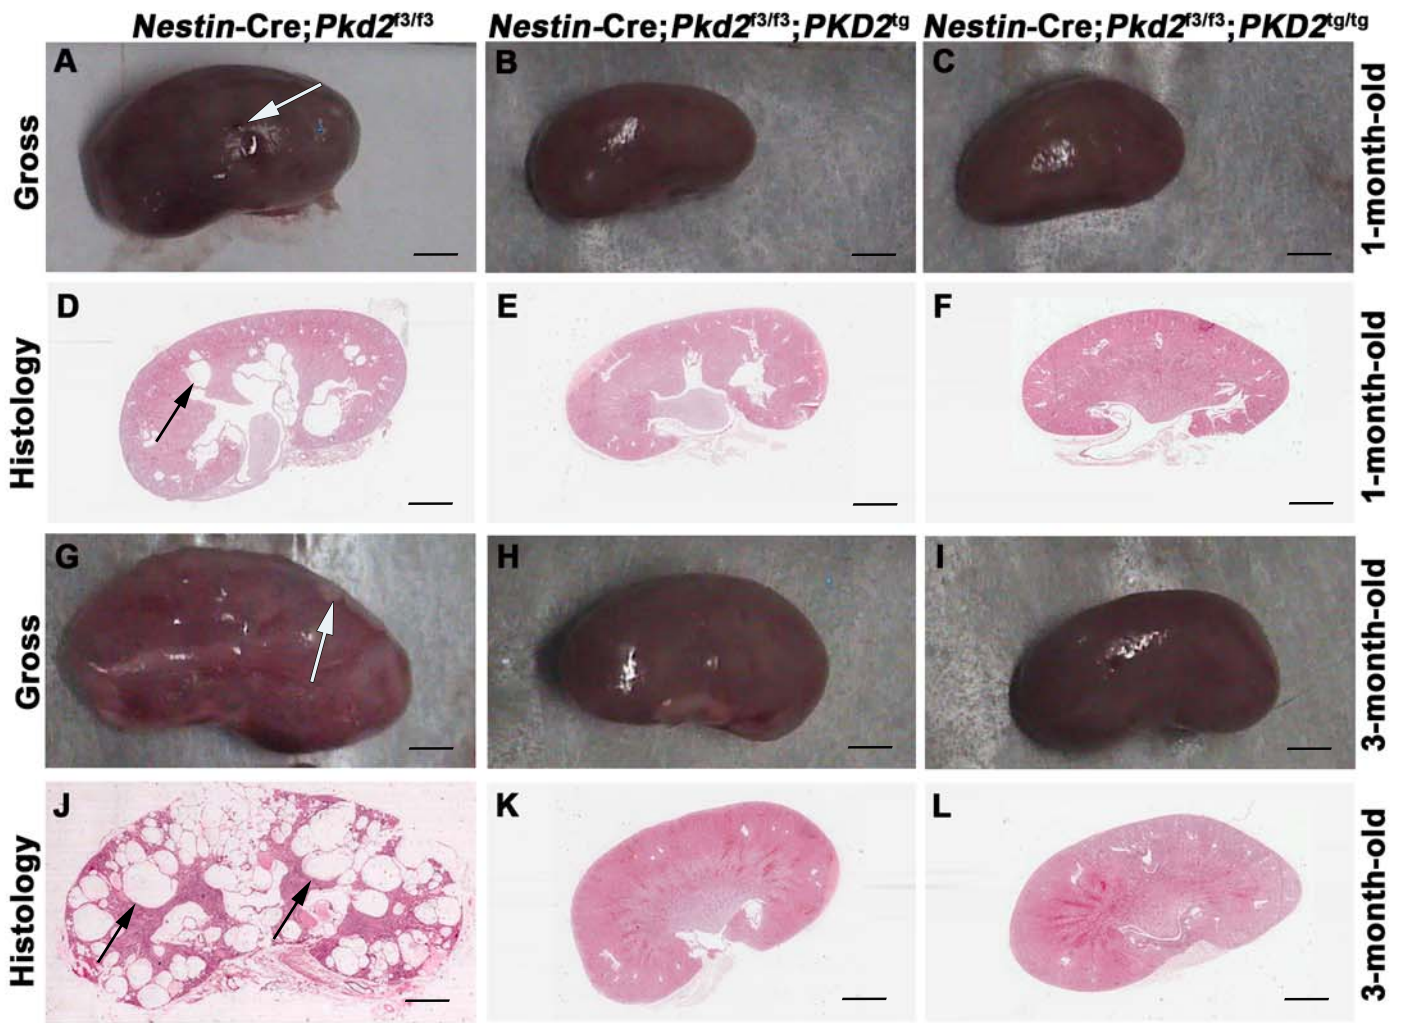

**Supplemental Fig. S3**

Supplement: mmc3.pdf [file mmc3.pdf]
